# Supplementary material for: Brain gray matter astroglia-specific connexin 43 ablation attenuates spinal cord inflammatory demyelination
Source: PubMed Central journal article supplement (PMC8180177; doi:10.1186/s12974-021-02176-1), 2021-06-05
Supplement: 12974_2021_2176_MOESM1_ESM.pdf [file 12974_2021_2176_MOESM1_ESM.pdf]

1 **Supplementary Figure Legends**

2 **Supplementary Fig. 1 Spinal cord and brain pathology in the pre-immunized**  
3 **phase and at the peak of acute EAE in *Cx43<sup>fl/fl</sup>* and *Cx43* icKO mice.**

4 Paraffin sections of mouse spinal cord and brain samples from the pre-immunized phase  
5 and dpi 17 (the peak of acute EAE) are shown. For quantification, the regions of interest  
6 (ROI) were outlined by a yellow line for the spinal cord, and by a yellow square for the  
7 stratum radiatum of hippocampus, as indicated. (a) HE staining. Bars: 100  $\mu$ m. (b)  
8 Klüver-Barrera (KB) myelin staining using Luxol fast blue (LFB). Bars: 100  $\mu$ m. (c)  
9 Statistical analysis of LFB<sup>+</sup> area % in the ROI of each image. One-way ANOVA  
10 followed by Tukey's post-hoc analysis was performed. n = 4. \*\*:  $P < 0.01$ , \*\*\*:  $P <$   
11 0.0001. (d) Anti-MBP immunostained images. Bars: 100  $\mu$ m. (e) Statistical analysis of  
12 MBP<sup>+</sup> area % in the ROI of each image. One-way ANOVA followed by Tukey's post-  
13 hoc analysis was performed. n = 4. \*\*:  $P < 0.01$ , \*\*\*:  $P < 0.0001$ . (f) Anti-Iba1  
14 immunostained images. Bars: 100  $\mu$ m. (g) Statistical analysis of Iba1<sup>+</sup> area % in the  
15 ROI of each image. One-way ANOVA followed by Tukey's post-hoc analysis was  
16 performed. n = 4. \*\*\*:  $P < 0.0001$ . (h) Anti-CD3 immunostained images. Bars: 100  $\mu$ m.

17

18 **Supplementary Fig. 2 Western blots for Cx43 in CNS tissues from *Cx43* icKO and**  
19 ***Cx43<sup>fl/fl</sup>* mice.**

20 (a) Western blots for Cx43 and  $\beta$ -actin in different CNS regions after tamoxifen  
21 treatment (n = 4). (b) Quantitative analysis of Cx43 protein amounts in each CNS region

1 by densitometry (n = 4). The graph shows the relative levels of Cx43 normalized against  
2  $\beta$ -actin by densitometry. The statistical significance of differences between *Cx43<sup>fl/fl</sup>* and  
3 *Cx43* icKO mice was determined by unpaired *t*-tests. \**P* < 0.05.

4

5 **Supplementary Fig. 3 Cx43 expression in peripheral immune cells and T cell**  
6 **responses to MOG in *Cx43* icKO and *Cx43<sup>fl/fl</sup>* mice.**

7 (a) I Immunofluorescence for Cx43 in the spleen and inguinal lymph nodes. Scale bars:  
8 100  $\mu$ m. (b) Splenic T cell proliferation assayed by bromodeoxyuridine (BrdU)  
9 incorporation at different MOG<sub>35-55</sub> concentrations (0, 2.5, 12.5, and 25  $\mu$ g/ml) in *Cx43*  
10 icKO and *Cx43<sup>fl/fl</sup>* mice (n = 4 per group) at dpi 17. (c–f) Inflammatory cytokine levels  
11 in culture supernatants of splenocytes obtained at dpi 17, stimulated with different  
12 concentrations of MOG<sub>35-55</sub> (0, 2.5, and 25  $\mu$ g/ml), and measured using a multiplexed  
13 fluorescence immunoassay. All data are shown as the means  $\pm$  SEM. Statistical analyses  
14 were performed by one-way ANOVA. No significant differences were found between  
15 *Cx43* icKO and *Cx43<sup>fl/fl</sup>* mice.

16

17 **Supplementary Fig. 4 Real time RT-PCR for the up-regulated chemokine genes**  
18 **identified by GSEA analysis.**

19 Real-time RT-PCR for *Ccl2*, *Ccl5*, *Ccl7*, and *Ccl8* using isolated microglia RNA from  
20 *Cx43* icKO and *Cx43<sup>fl/fl</sup>* mice in the preimmunized phase and at the peak of acute EAE  
21 (dpi 17). Microglia isolated from spinal cords of mice in the same experimental group

1 (n = 4) were pooled and subjected to RNA extraction. Genes of interest were compared  
2 with and are expressed as ratios relative to the reference gene (18S ribosomal RNA,  
3 *RNI8s*). Reduced rates of expression are indicated by downward arrows on bars with  
4 the value of each reduction.

5

6

7

8

# Suppl Fig. 1

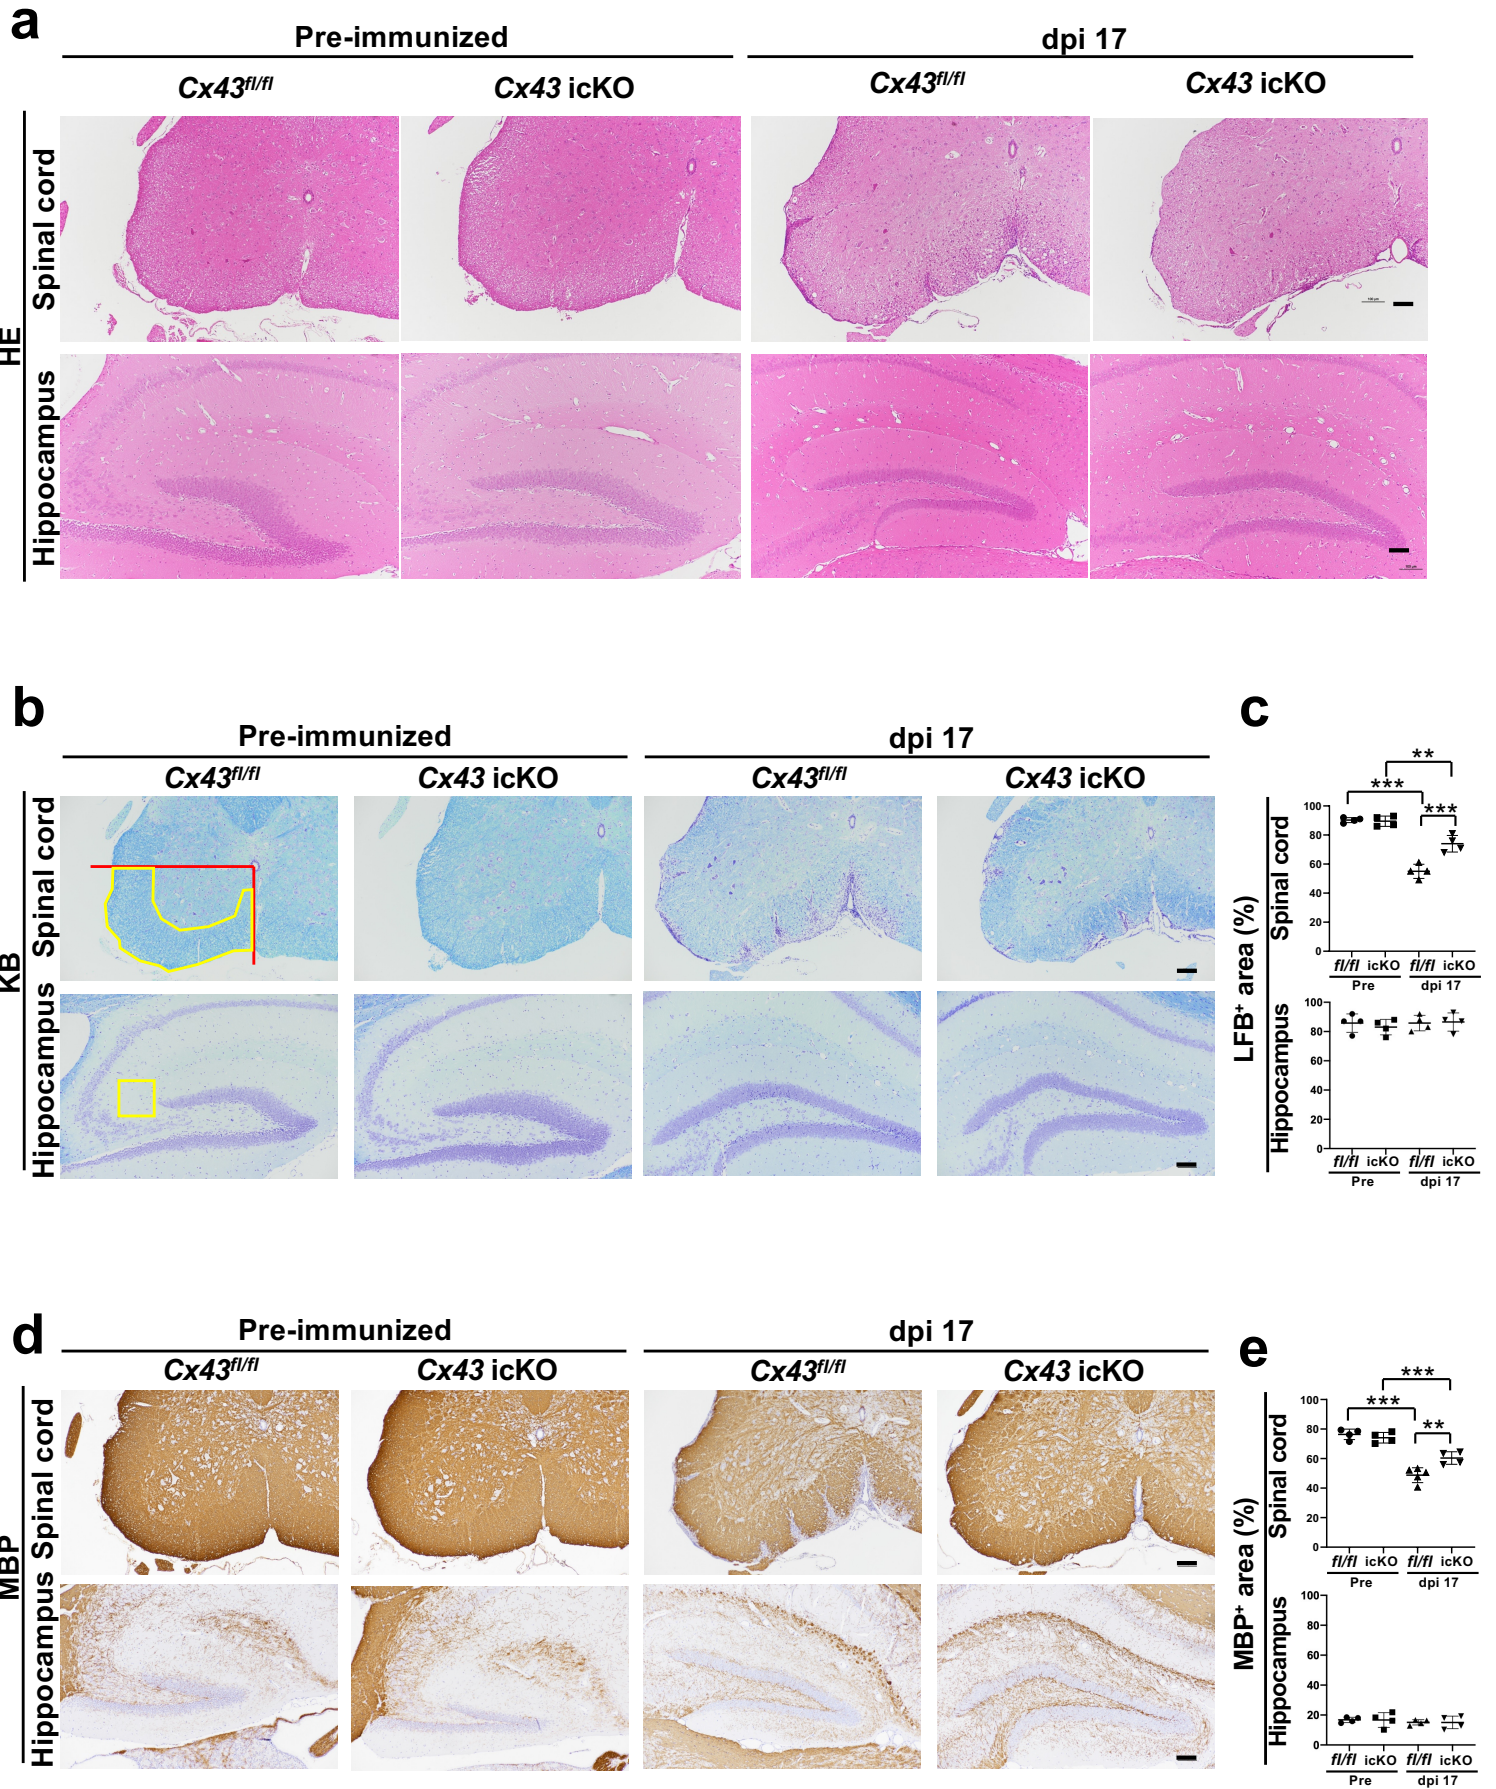



# Suppl Fig. 1 continued

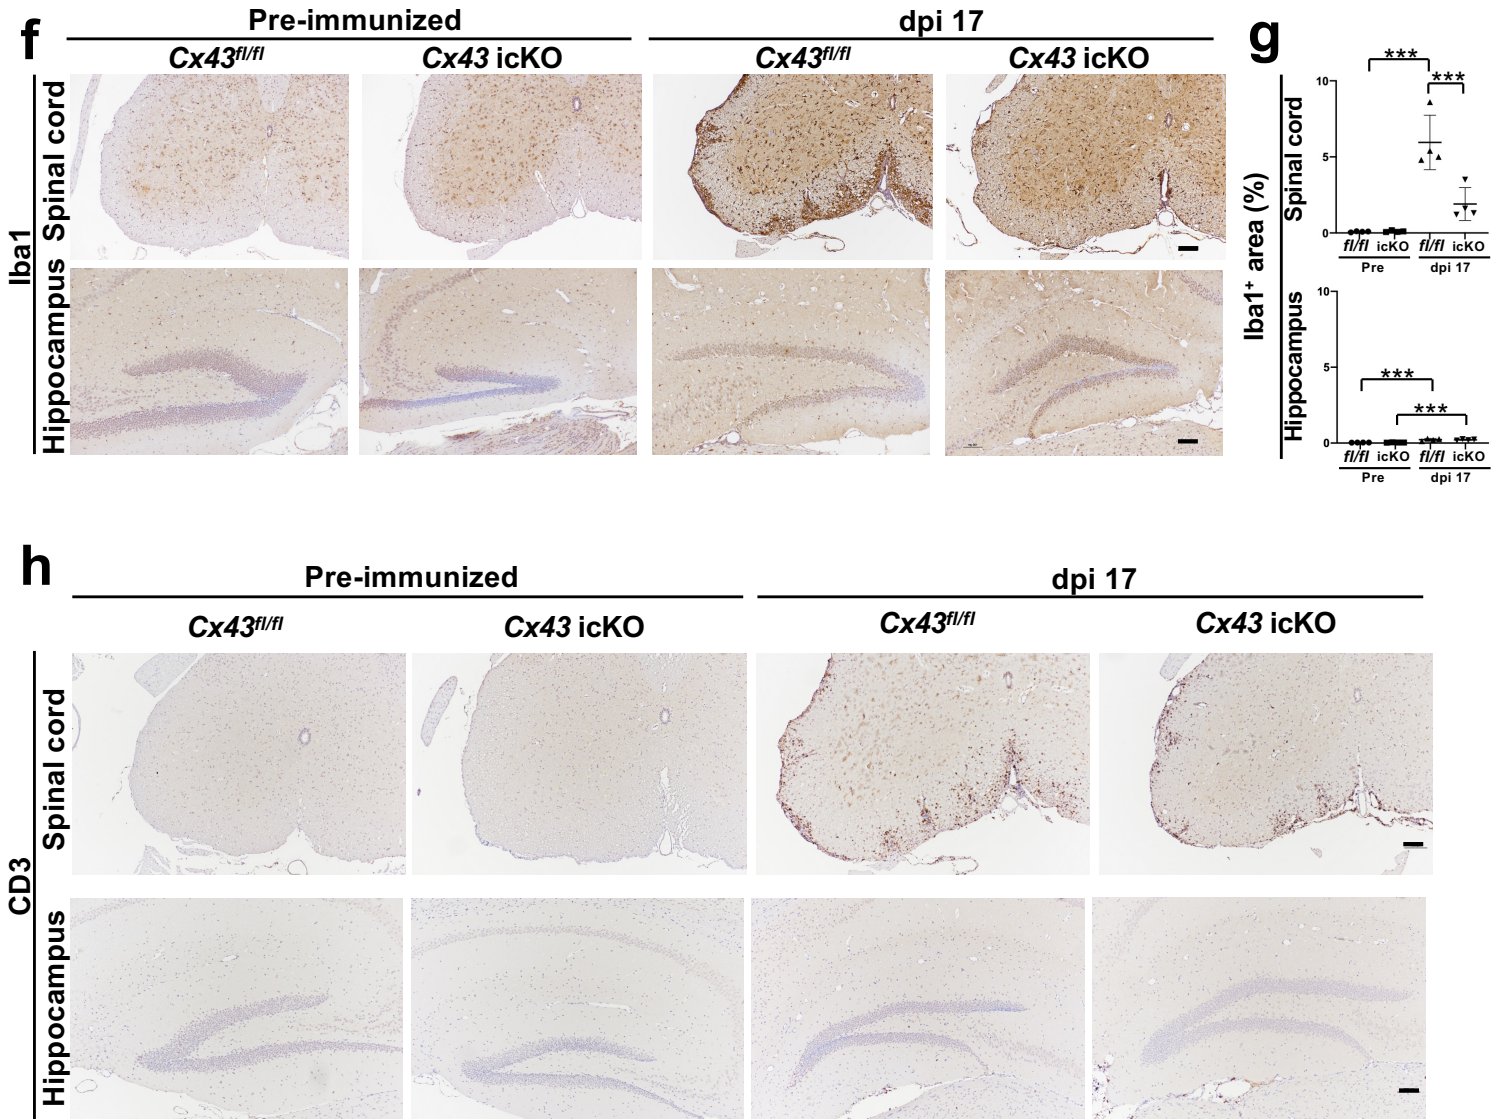

Suppl Fig. 2

a

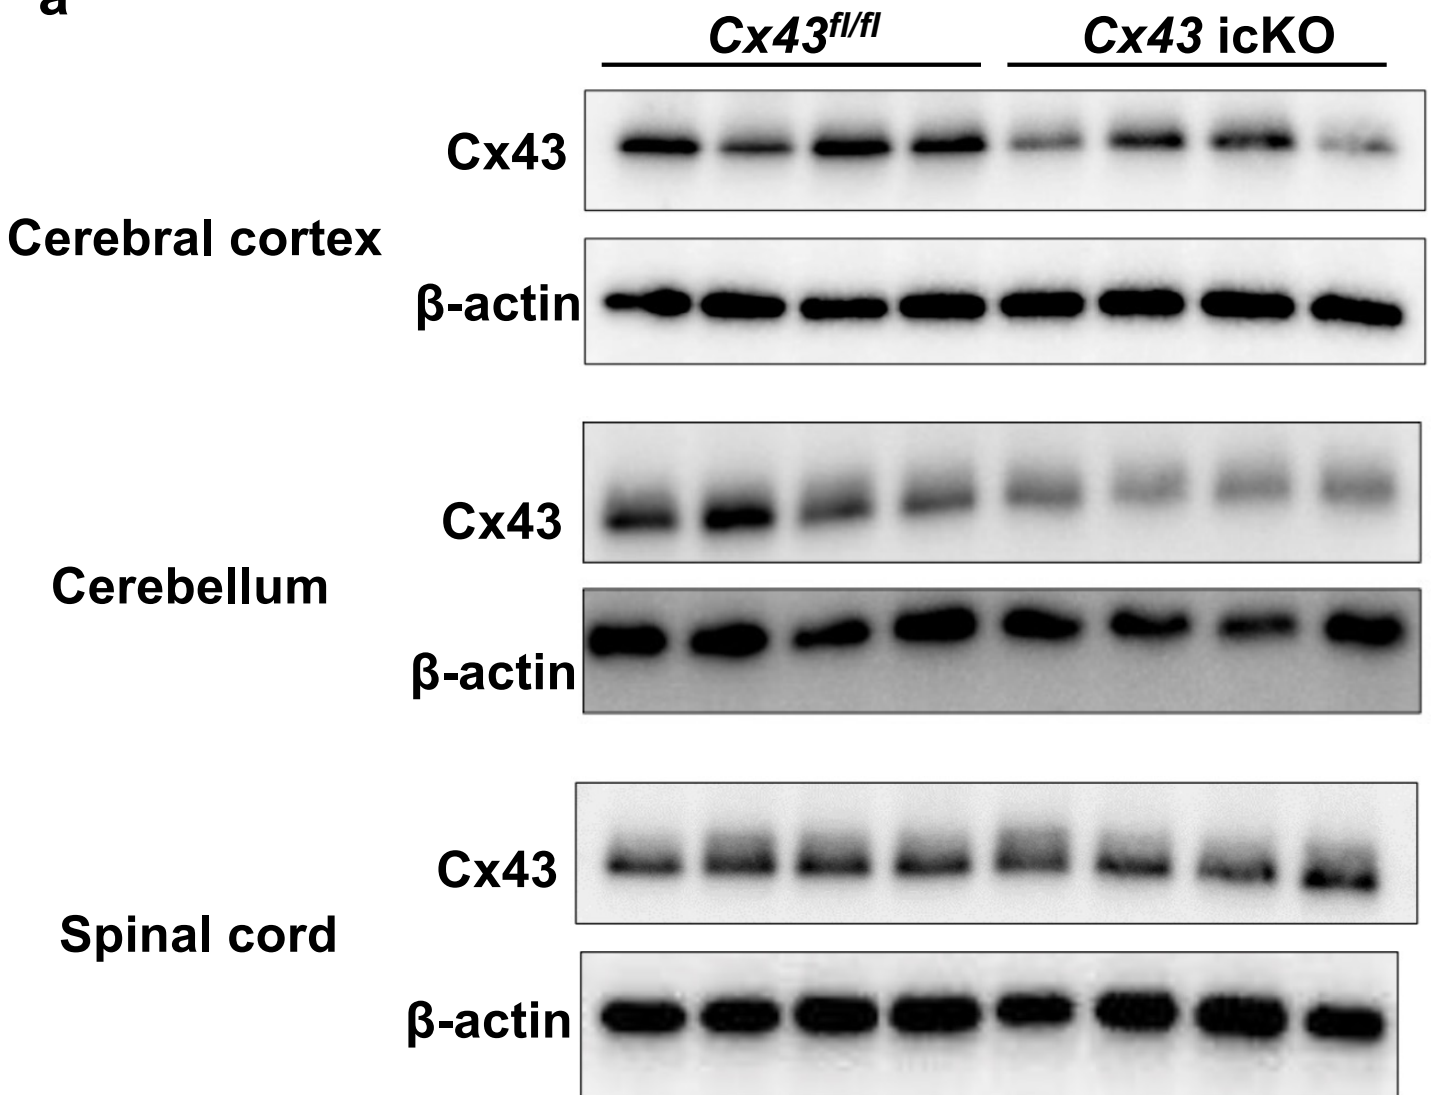

b

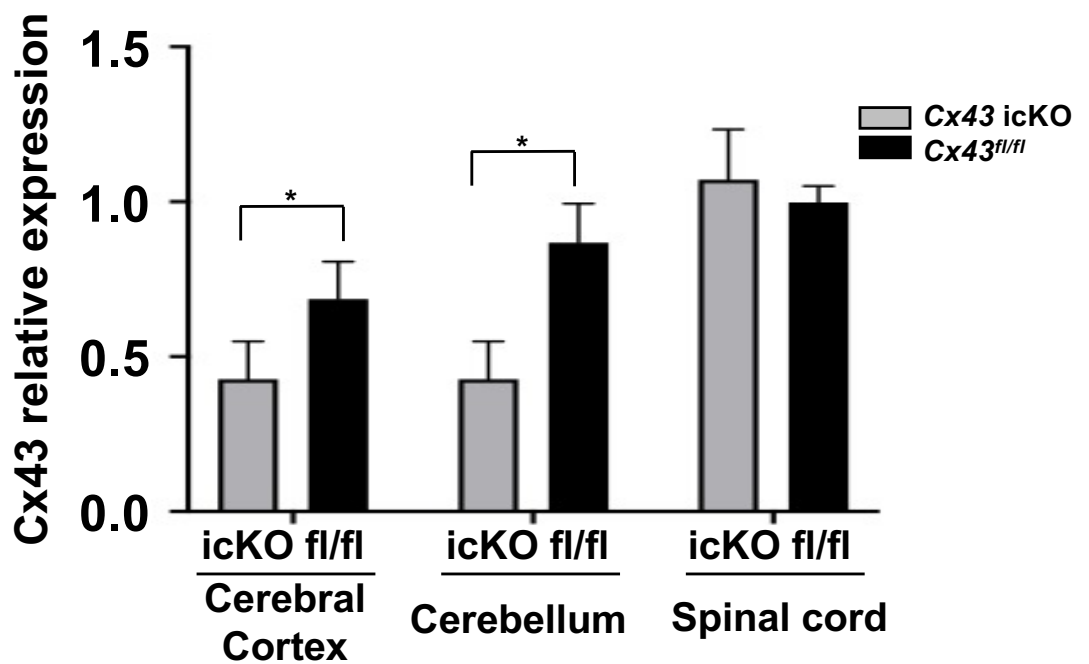

# Suppl Fig. 3

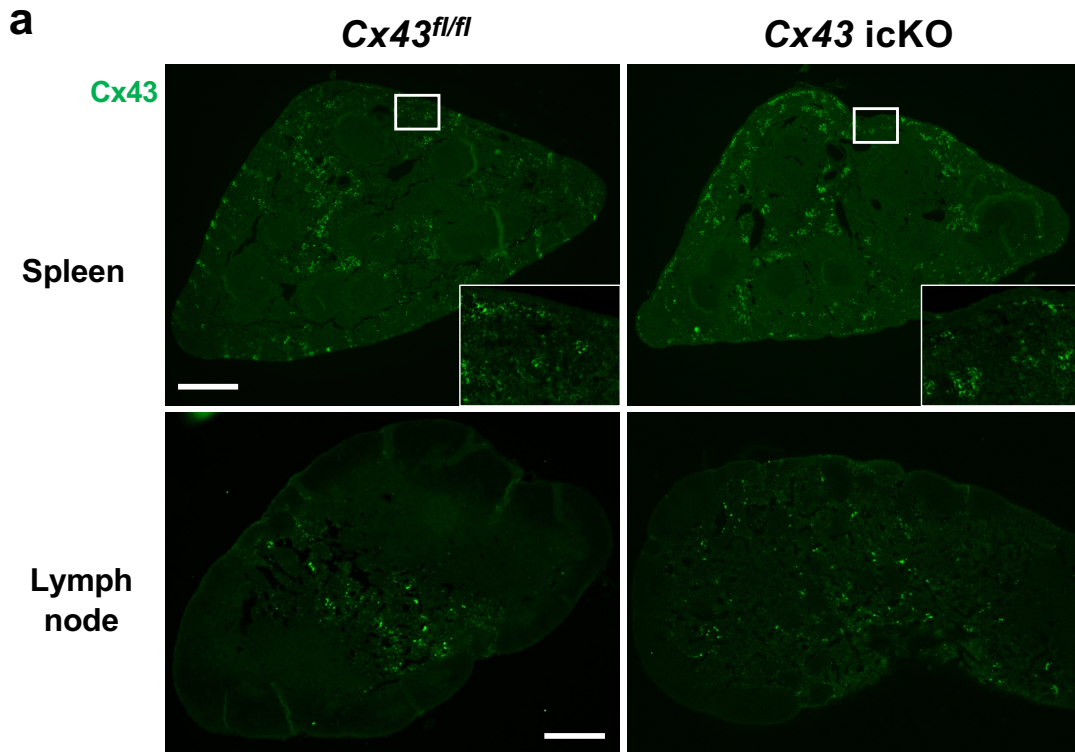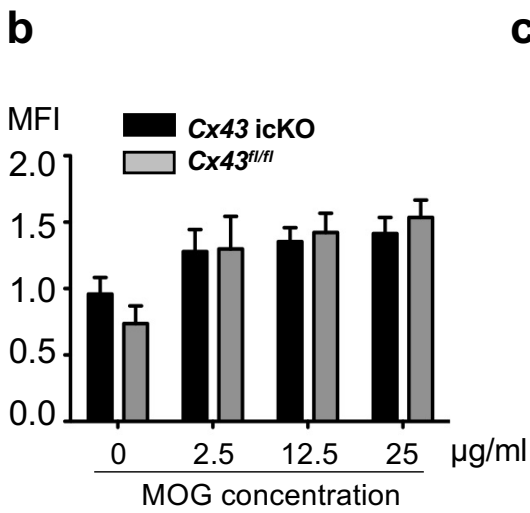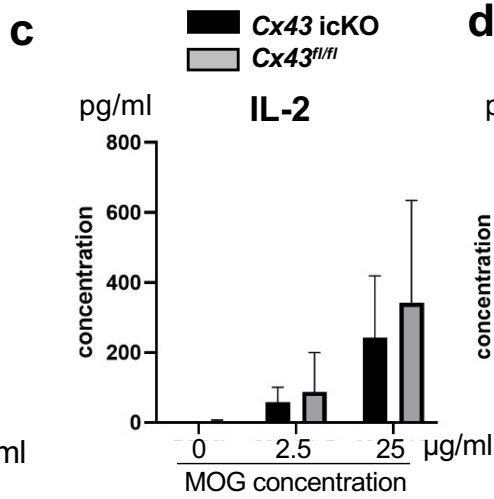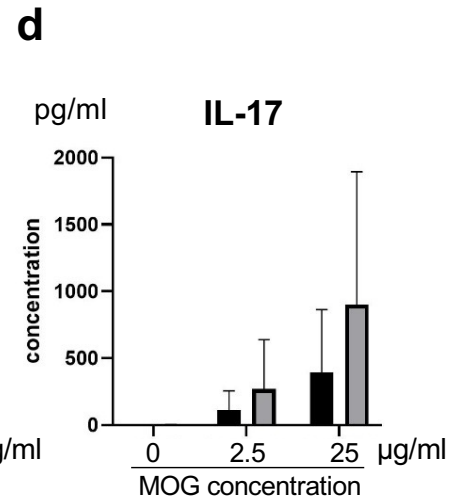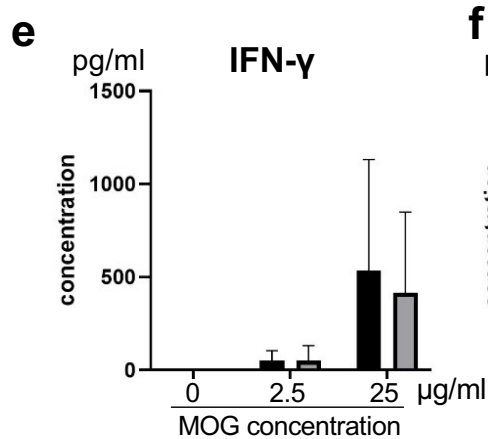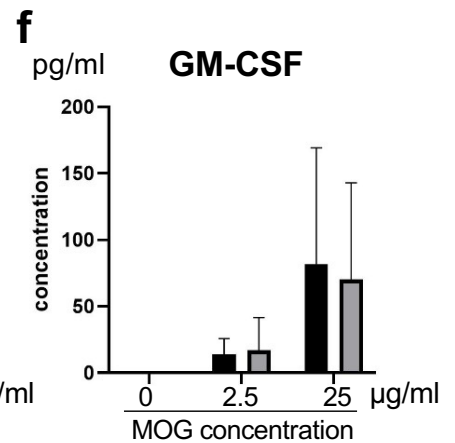

Suppl Fig. 4

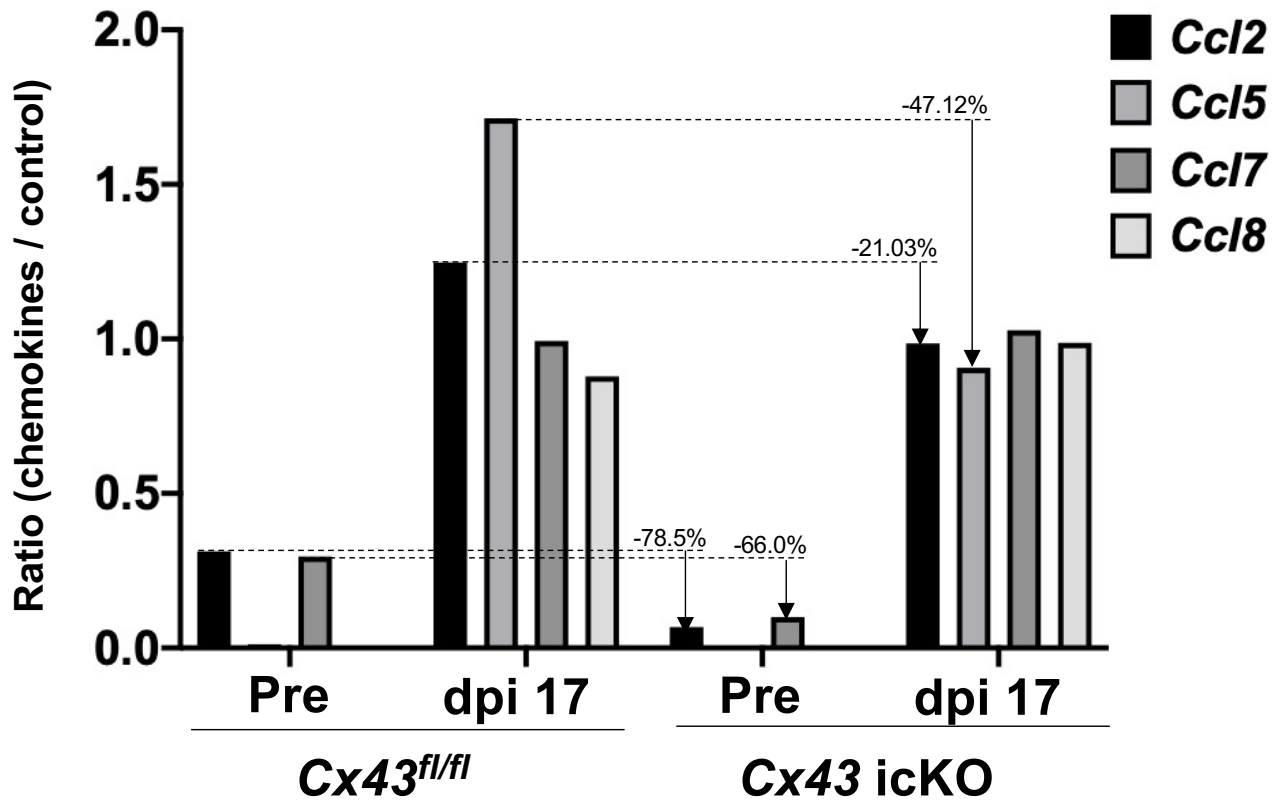

1 **Supplementary Table 1.** Antibodies used in this study.

| Antigen                                    | Clone      | Type         | Dilution        | Incubation |               | Source                    |
|--------------------------------------------|------------|--------------|-----------------|------------|---------------|---------------------------|
|                                            |            |              |                 | Temp       | Time          |                           |
| <b>Connexin 43</b>                         | Polyclonal | Rabbit       | 1:1,000         | 4°C        | Over<br>night | Abcam                     |
| <b>Connexin 43<br/>(immunoblot)</b>        | Polyclonal | Rabbit       | 1:40,000        | 4°C        | 2 h           | Abcam                     |
| <b>GFAP</b>                                | Polyclonal | Rabbit       | Ready to<br>use | 4°C        | Over<br>night | DAKO                      |
| <b>Iba1</b>                                | Polyclonal | Rabbit       | 1:1,000         | 4°C        | Over<br>night | Wako                      |
| <b>Mouse CD3<br/>molecular<br/>complex</b> | 17A2       | Rat IgG2b    | 1:200           | 4°C        | Over<br>night | BD<br>Pharmin<br>gen      |
| <b>CD45</b>                                | IBL3/16    | Rat IgG1     | 1:100           | 4°C        | Over<br>night | Bio-Rad<br>AbD<br>Serotec |
| <b>Myelin basic<br/>protein<br/>(MBP)</b>  | 1          | Mouse<br>IgG | 1:1,000         | 4°C        | Over<br>night | DAKO                      |



|                                        |            |           |          |     |               |                        |
|----------------------------------------|------------|-----------|----------|-----|---------------|------------------------|
| <b>S100a10</b>                         | Polyclonal | Goat      | 1:1,000  | 4°C | Over<br>night | R&D<br>Systems,<br>Inc |
| <b>Complement<br/>component<br/>C3</b> | Monoclonal | Rat IgG2a | 1:50     | 4°C | Over<br>night | Hycult<br>Biotech      |
| <b>F4/80</b>                           | Cl:A3-1    | Rat       | 1:100    | 4°C | Over<br>night | Abcam                  |
| <b>Arginase 1<br/>(Arg-1)</b>          | Monoclonal | Mouse     | 1:100    | 4°C | Over<br>Night | Santa<br>Cruz          |
| <b>β-actin</b>                         | AC-15      | Mouse     | 1:10,000 | 4°C | 1 h           | Sigma                  |

1 GFAP = glial fibrillary acidic protein.

2

3

4
